# Supplementary figures and images for: High-resolution physical map for chromosome 16q12.1-q13, the Blau syndrome locus
Source: Springer Nature journal article supplement (doi:10.1186/1471-2164-3-24), 2002-08-19

NCBI Build 25

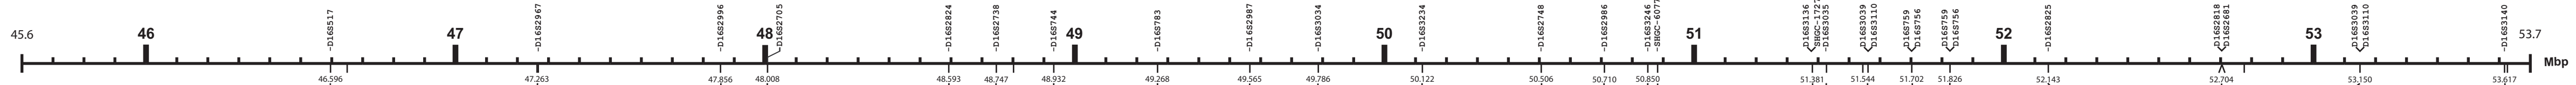

Markers

NCBI Build 29

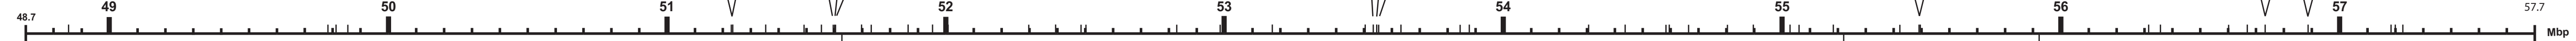

Transcripts

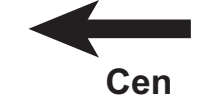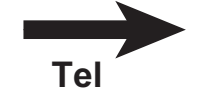

G3 RH

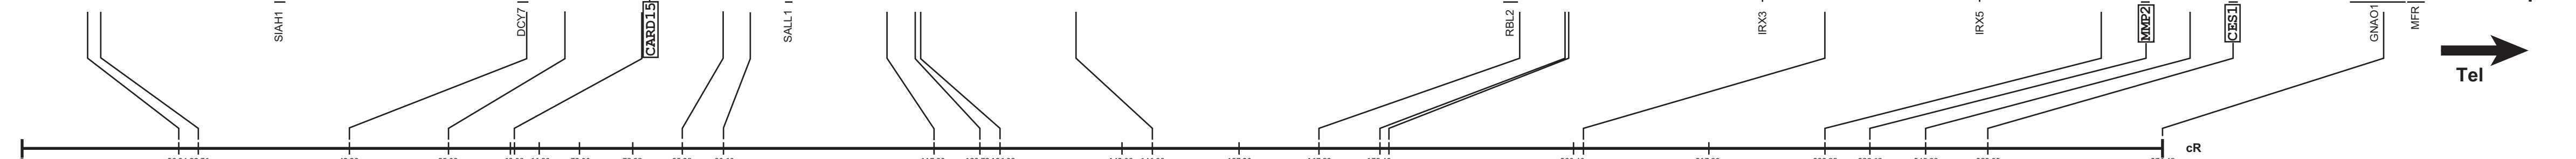

BAC contig

Markers

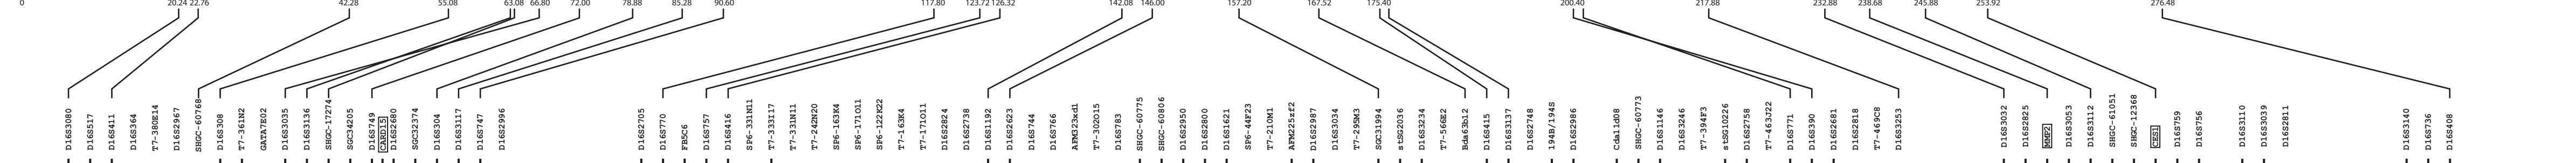

CITB Clones

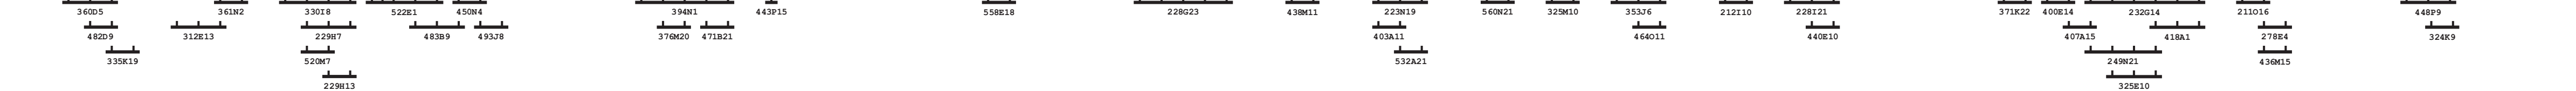

RPCI-11 Clones

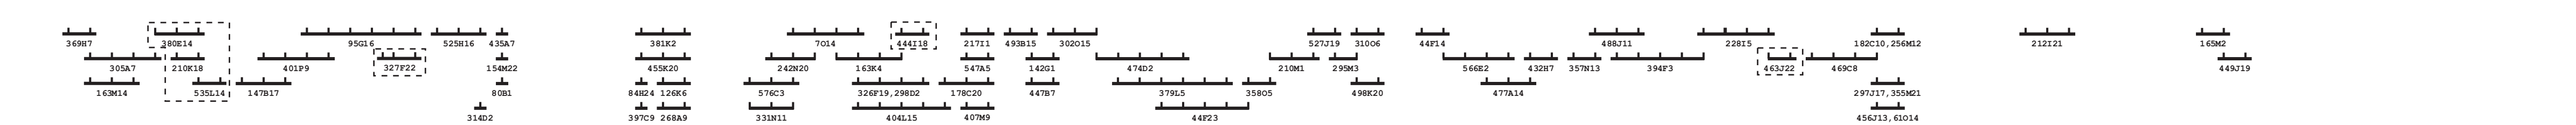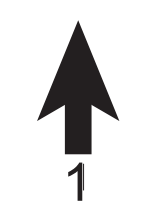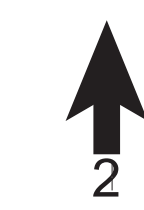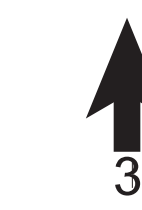

Supplement: Additional file 1 [file 1471-2164-3-24-s1.pdf]
